# Supplementary material for: Rainfall simulation experiments in the Southwestern USA using the Walnut Gulch Rainfall Simulator
Source: Copernicus journal article supplement (doi:10.5194/essd-2017-81), 2017-08-28
Supplement: Supplementary file [file essd-2017-81-AC1-supplement.pdf]

1 Rainfall simulation experiments in the Southwestern USA using the Walnut Gulch  
2 Rainfall Simulator.

3  
4  
5 V. Polyakov<sup>1</sup>, J. Stone<sup>1</sup>, C. Holifield Collins<sup>1</sup>, M. A. Nearing<sup>1</sup>,  
6 G. Paige<sup>2</sup>, J. Buono<sup>3</sup>, R.-L. Gomez-Pond<sup>4</sup>

7  
8 <sup>1</sup>Southwest Watershed Research Center, USDA-ARS, Tucson, AZ, USA

9 <sup>2</sup>Ecosystem Science and Management, University of Wyoming, Laramie, WY, USA

10 <sup>3</sup>Ecohydrologist, Chennai, India

11 <sup>4</sup>School of Natural Resources, University of Nebraska, Lincoln, NE, USA

12  
13  
14  
15 **Abstract**

16  
17 The dataset contains hydrological, erosion, vegetation, ground cover, and other  
18 supplementary information from 272 rainfall simulation experiments conducted on 23 semi-arid  
19 rangeland locations in Arizona and Nevada between 2002 and 2013. On 30% of the plots  
20 simulations were conducted up to five times during the decade of study. The rainfall was  
21 generated using the Walnut Gulch Rainfall Simulator on 2 m by 6 m plots. Simulation sites  
22 included brush and grassland areas with various degree of disturbance by grazing, wildfire, or  
23 brush removal. This dataset advances our understanding of basic hydrological and biological  
24 processes that drive soil erosion on arid rangelands. It can be used to ~~estimate~~ quantify runoff,  
25 infiltration, and erosion rates on a variety of ecological sites in the Southwestern USA. Inclusion  
26 of wildfire and brush treatment locations combined with long term observations makes it  
27 important for studying vegetation recovery, ecological transitions, and effect of management. It  
28 is also a valuable resource for erosion model parameterization and validation.

29 The data set available from the National Agricultural Library at  
30 <https://data.nal.usda.gov/search/type/dataset> (DOI: 10.15482/USDA.ADC/1358583).

31  
32  
33 Key words: soil erosion, rainfall simulator, runoff, infiltration, ground cover, rangeland  
34  
35

## 1. Introduction

Soil erosion negatively impacts rangelands by impairing their ability to produce biomass (Stavi et al., 2009; Yisehak et al., 2013). The extent of this influence in comparison with other environmental and anthropogenic factors is poorly understood. Preservation and sustainable management of semi-arid ecosystems requires good knowledge of the physical processes involved in soil erosion and their interaction with plant communities. The experimental data needed to generate this knowledge is limited in time and space and often lacks ecological context in which it was gathered. Further, such data are difficult ~~and costly or often impossible~~ to acquire by instrumenting natural hydrological systems (Nichols, 2006).

Artificial rainfall experiments on small plots provide a relatively quick and economical way to obtain necessary erosion information in a controlled and replicable setting (Lascelles et al., 2000; Parsons and Lascelles, 2000; Yakubu and Yusop, 2017). Field experiments under simulated rainfall have been conducted in the US since 1930s using stationary sprinkler systems (Meyer and McCune, 1958). Later simulators utilized a rotating boom design and V-jet nozzles (Swanson, 1965), which enhanced uniformity and allowed easier control of rainfall intensity. Further advancement came with the development of a portable Walnut Gulch Rainfall Simulator (WGRS) that featured improved spatial distribution of rainfall over a wider plot area, with rainfall energy and drop sizes similar to those of natural events (Paige et al., 2004).

The presented rainfall simulation data were collected by the Southwest Watershed Research Center (SWRC) over the period of 12 years (2002-2013) using WGRS. The set encompasses ~~272 simulation experiments conducted on~~ 23 rangeland sites located in ~~four Major Land Resource Areas (MLRA), namely 28B, 38 3, 41 1, and 41 3. A total of 272 simulation experiments were conducted on 154 runoff plots - grassland, shrub land, juniper, and oak savanna communities, many of which were affected by~~ Among these plots 53 were permanent, established to monitor long term ecological site transitions triggered by wildfire, grazing, or brush and tree removal. ~~Plots at any given site were replicated four times in most cases.~~ The dataset contains hydrological (runoff rate and flow velocity) and erosion (sediment concentration and rate) measurements obtained over a wide range (60 mm h<sup>-1</sup> to 180 mm h<sup>-1</sup>) of rainfall intensities. Ground cover (vegetation, basal, litter, rock, soil) and other supporting information are also provided ~~for every plot~~. The dataset is supplemented with ~~orthogonal ground cover~~ photographs ~~of individual plots and landscapes taken prior to every simulation. The compiled and organized dataset will facilitate better dissemination of information among researchers enabling further insights into soil erosion processes. It will compliment a similar and ongoing efforts by SWRC to document long term watershed scale processes on arid rangelands~~ (Nichols et al., 2008; Stone et al., 2008).

Our objectives are to provide information on: a) basic erosion processes and interactions between rainfall, runoff, infiltration, surface cover, and their spatial variability; b) erosion rates on different ecological sites; c) the impacts of grazing, brush treatment, wildfires, and ecological transitions on erosion; d) parameters for hydrological and erosion models and their validation.

## 2. Experimental area

Twenty three rainfall simulation sites were established throughout Arizona and Nevada rangelands (Table 1, Appendix B). In Arizona the climate is defined by the North American Monsoon (Adams and Comrie, 1997). Most of precipitation is delivered by short-duration, high

82 intensity convective storms that occur July through September. May and June are the driest  
83 months of the year.

84 Six sites were located at Walnut Gulch Experimental Watershed (WGEW) in the upper  
85 San Pedro River basin in southeastern Arizona in CRA 41.AZ3 (Chihuahuan-Sonoran  
86 Semidesert Grasslands). Mean annual temperature in the area is 17.7° C. The LH and CR sites  
87 are located on Limy Upland (R041XC309AZ) that dominate the western portion of the WGEW.  
88 The representative soil series there are Luckyhill (Coarse-loamy, mixed, superactive, thermic  
89 Ustic Haplocalcids) and McNeal (Fine-loamy, mixed, superactive, thermic Ustic Calcicargids)  
90 very gravely sandy loam (NRCS, 2003). The soil consists of approximately 39% gravel, 32%  
91 sand, 16% silt, and 13% clay. Limy Uplands have enough precipitation (290 mm y<sup>-1</sup>) to support  
92 grass communities, however the soils (coarse textured and high in carbonates) favor drought  
93 tolerant shrubs, such as creosote (*Larrea tridentata* (DC.) Coville) and whitethorn (*Acacia*  
94 *constricta* Benth.). Grasses in this environment account for no more than 30% of biomass  
95 production, even less if the area is grazed. Brush control measures on Limy Uplands have low  
96 chance of long-term success. Kendall sites (K2, K3) are located on Loamy Upland  
97 (R041XC313AZ). The area receives an average of 345 mm of precipitation a year. The soils  
98 there are a complex of Stronghold (Coarse-loamy, mixed, thermic Ustollic Calciorrhids), Elgin  
99 (Fine, mixed, thermic, Ustollic Paleargids), and McAllister (Fine-loamy, mixed, thermic,  
100 Ustollic Haplargids) (NRCS, 2003). Stronghold, a dominant soil, contains 67% sand, 16% silt,  
101 and 17% clay, with 79% coarse fragments (>2 mm). The organic carbon content of the soil  
102 surface (0–2.5 cm) is 1.1%. Desert bunchgrasses, such as black grama (*Bouteloua eriopoda*  
103 Torr.), sideoats grama (*B. curtipendula* Torr.), three-awn (*Aristida* sp.), and cane beardgrass  
104 (*Bothriochloa barbinodis* (Lag.) Herter) and forbs dominate the area. Some shrubs and  
105 succulents are also present. The site has been affected by a recent Lehmann lovegrass  
106 (*Eragrostis lehmanniana* Nees) invasion (Moran et al., 2009; Polyakov et al., 2010).

107 Six rainfall sites located on the historic Empire Ranch northeast of Sonoita, Arizona are  
108 also in CRA41.AZ3 and all are Loamy Uplands. Empire Ranch has been heavily grazed in the  
109 past, although the timing and extent of grazing is poorly documented. The annual precipitation at  
110 these locations ranges between 300 and 400 mm y<sup>-1</sup>. The soils are gravelly loams and belong to  
111 the White House (fine, mixed, thermic, Ustollic Haplargids) soil series (NRCS, 2003). They  
112 were formed on alluvial fans and are characterized by a shallow A horizon underlain by deep  
113 argillic and calcic horizons. Sites ER1, ER2, and ER5 have historic climax plant community  
114 (HCPC) dominated by beardgrass (*Bothriochloa* spp.), grama (*Bouteloua* spp.), lovegrass  
115 (*Eragrostis* spp.), three-awn (*Aristida* spp.), and native forbs. ER3, ER4S, and ER4G have  
116 Mesquite-native plant community. All Empire Ranch sites were being grazed at the time of the  
117 experiments, except ER5 which has been an enclosure since the mid 1980s. The ER2 site had a  
118 wildfire in 2000 and had heavy grazing until the mid 2000s. ER3 site burned in 2005 prior to  
119 rainfall simulation that year. The ER4S has established mesquites on the plots and the mesquites  
120 on ER4G had been mechanically removed in 2006 a month after rainfall simulation. By 2010,  
121 the mesquite had re-sprouted and was approximately 2 m tall. ER4S and ER4G are located in  
122 close proximity to each other and share the same hydro-ecological characteristics.

123 San Rafael Valley and Audubon Ranch south of Sonoita, Arizona contained six  
124 simulation locations. SA and Ab in San Rafael Valley are located in CRA 41.AZ1 (Mexican  
125 Oak-Pine Forest and Oak Savannah) at 1550-1600 m elevation in 400-500 mm precipitation  
126 zone. Vegetation there includes Emory oak (*Quercus emoryi* Torr.), Mexican blue oak (*Q.*  
127 *oblongifolia* Torr.), Arizona white oak (*Q. arizonica* Sarg.), and grama species (*Bouteloua* spp.).

128 The ecological sites in this area are Loamy Uplands (PC, Wi, Ab, and SA), Loamy Slope (EM)  
129 and Clay Loam Uplands (Ta). San Rafael Valley is dominated by the White House soil series.  
130 The soil on EM is Terrarossa (Fine, mixed, superactive, thermic Aridic Paleustalfs), and on PC is  
131 Blacktail (Fine, mixed, superactive, thermic Calcic Argiustolls). PC, EM, Wi and Ta sites are  
132 grasslands dominated by black grama (*Bouteloua eriopoda* Torr.), plains lovegrass (*Eragrostis*  
133 *intermedia* Hitchc.), and cane bluestem (*Bothriochloa barbinodis* (Lag.) Herter) with inclusion  
134 of native forbs. All of the sites experienced recent wildfires: EM, and PC in 2002, Ab in 2003,  
135 Ta in 2004, SA in 2005, and Wi in 2006. On all San Rafael Valley sites a set of natural (non-  
136 burned) plots were established next to the burn sites as a control. Grasslands have been under  
137 USFS grazing management plan during time of the experiments.

138 Three experimental sites (Yg1, Yg2, and Yg3) were located 9 km north of Young,  
139 Arizona in [Major Land Resource Area \(MLRA\) 38](#) (Mogollon Transition Area) on Clay Loam  
140 Upland (R038XC303AZ) (USDA, 2006). The average annual precipitation in the area is 580 mm  
141 and the mean annual temperature is 11° C. Snow falls occasionally in winter. The soil is  
142 Terrarosa clayloam (Fine, mixed, superactive, thermic Aridic Paleustalfs). It is deep and well  
143 drained with > 1% organic matter, has a well developed argillic horizon and can be easily  
144 compacted by livestock when moist. The depth of soil freezing in the winter is 10-15 cm. Yg1  
145 and Yg2 sites are in HCPS (Historic Climax Plant Community) state dominated by grama  
146 species (*Bouteloua sp.*) (canopy cover of 40 to 60%) and cool season grasses. Mean annual  
147 production of above ground biomass estimated at 1600 kg/ha and effective rooting depth of  
148 perennial grasses is 70 cm. Possible STM transition (with disturbance, invasion or alteration of  
149 fire regimes) is to juniper woodland. Wildfires in the area occur every 10 to 15 years. Yg3 was in  
150 alligator juniper woodland state. Juniper was mechanically removed on the site a year prior to  
151 2012 rainfall simulation.

152 Two sites (PCE, PCW) were located in Nevada, 100 km east of Fallon in MLRA 28B  
153 (Central Nevada Basin and Range) on Loamy Slopes (028BY113NV). The climate associated  
154 with this site is semi-arid, characterized by cold, moist winters and warm, dry summers with  
155 large temperature variations. The driest period is from mid-summer to mid-autumn. Average  
156 annual precipitation is 400 mm. Mean annual air temperature is 6° C and freeze-free period  
157 averages 125 days. The soil on the site is Tierney series (Loamy-skeletal, mixed, superactive,  
158 frigid Cumulic Haploxerolls). It is formed in alluvium derived from mixed parent material, very  
159 deep, well drained and has very low available water capacity. Clay content averages 12% and  
160 rock fragments are 35% by volume. The dominant vegetation on the site is bluegrass (*Poa annua*  
161 L.), mountain big sagebrush (*Artemisia tridentata* Nutt.), needle and thread (*Hesperostipa*  
162 *comata* (Trin. & Rupr.) Barkworth), rubber rabbitbrush (*Ericameria nauseosa* (Pall. ex Pursh)  
163 G.L. Nesom & Baird), sedge (*Cyperaceae* spp.), and western wheatgrass (*Pascopyrum*  
164 *smithii* (Rydb.) Á. Löve). Fire return interval varies from 15 to 25 years. Plants are readily killed  
165 in all seasons, even by light severity fires. Overgrazing and decline of ecological conditions leads  
166 to an increase in big sagebrush and decline in understory plants.

### 167 3. Instrumentation

#### 168 3.1. Water application

169  
170 Rainfall was generated by WGRS, a portable, computer-controlled, variable intensity  
171 simulator (Paige et al., 2004). The WGRS can deliver rainfall rates ranging between 13 and 178  
172 mm h<sup>-1</sup> with variability coefficient of 11% across 2 by 6.1 m area. Estimated kinetic energy of

173 simulated rainfall was 204 kJ ha<sup>-1</sup> mm<sup>-1</sup> and drop size ranged from 0.288 to 7.2 mm. The  
174 simulator is equipped with a single oscillating boom with four V-jet nozzles with overlapping  
175 spray pattern and 50° sweep. The operating height of the nozzles is 2.4 m above ground at 55  
176 kPa water pressure. The oscillations are controlled by a high torque stepper motor that varies the  
177 speed of the nozzles, slower at the ends of the oscillation and faster in the middle when the  
178 nozzles are pointed directly down. This approach improves uniformity of the water application  
179 across the plot. The spray time and sequence are controlled by three-way solenoids. A PC and a  
180 controller are used to setup various rainfall programs. Detailed description and design of the  
181 simulator is available in Paige et al. (2004). Prior to each field season the simulator was  
182 calibrated over a range of intensities using a set of 56 rain gages arranged on the plot in  
183 rectangular grid. During the experiments windbreaks were placed around the simulator to  
184 minimize the effect of wind on rain distribution. The general view of the simulator with  
185 windbreaks, runoff flume, and control equipment is shown on (Figure- 1).

186 During 93 simulations run-on flow was applied at the top edge of the plot using a  
187 perforated pipe placed horizontally over a narrow strip of cloth directly on the soil surface. This  
188 arrangement ensured uniform initial sheet flow and prevented localized scour. The purpose of  
189 run-on water application was to simulate hydrological processes that occur on longer slopes (>6  
190 m) where the upper portion of the slope contributes runoff onto the lower portion. In a limited  
191 number of experiments run-on flow rate was unknown. In these cases it was labeled as “rate1”,  
192 “rate2” etc. in the data file.  
193

### 194 3.2. Runoff

195 Runoff rate from the plot was measured using a V-shaped supercritical flume positioned at  
196 4% slope and equipped with an electronic depth gage. Flow depth was recorded manually and  
197 converted to flow rate using the following depth to discharge relationship:

$$198 \quad Q = ah^b \quad (1)$$

199 where Q is discharge (L s<sup>-1</sup>), h is flow depth in the flume (mm), a and b are calibration  
200 coefficients. The flume was calibrated before every field season.  
201

### 202 3.3. Flow velocity

203 Overland flow velocities on the plots were measured using electrolyte and fluorescent dye  
204 solution starting in 2006. Two liters of the solution were uniformly applied on the surface using a  
205 perforated PVC pipe placed across the plot 3.3 m from the outlet. Dye moving from the  
206 application point to the outlet was timed with a stopwatch. Electrolyte transport in the flow was  
207 measured by resistivity sensors imbedded in edge of the outlet flume at the end of the plot. The  
208 data was collected at 0.37 s intervals with real time graphical output using LoggerNet software  
209 and CR10X data logger by Campbell Scientific. Maximum flow velocity (V<sub>m</sub>, m s<sup>-1</sup>) was  
210 defined as velocity of the leading edge of the solution and was determined from beginning of the  
211 breakthrough curve (Fig. 2) and verified by visual observation of dye front. Mean flow velocity  
212 (V<sub>a</sub>, m s<sup>-1</sup>) was calculated using mean travel time obtained from the salt concentration  
213 breakthrough curve (Fig. 2) and the following equation:

$$214 \quad T_a = \sum_{i=t_s}^{t_e} c_i t_i / \sum_{i=t_s}^{t_e} c_i \quad (2)$$

215 where t<sub>s</sub> is curve start time (s), t<sub>e</sub> is curve end time or return to baseline (s), t<sub>i</sub> is instantaneous  
216 time (s), and c<sub>i</sub> is normalized conductivity.  
217

218 3.4. Erosion.

219 Sediment concentrations from the plots were determined from 1 liter runoff samples  
220 collected during each run. Sampling interval time was variable and aimed to represent rising and  
221 falling limbs of the hydrograph, any changes in runoff rate, and steady state conditions (a  
222 minimum of 3 samples). This resulted in approximately 30 to 50 samples per simulation. A  
223 coagulant solution was added to the samples to flocculate and settle the sediments. After the  
224 settling, the excess water was decanted and the sediments were dried at 105<sup>0</sup> C. Wet and dry  
225 samples were weighed and sediment concentration in the runoff samples calculated  
226 gravimetrically. Soil losses were determined from the combination of sediment concentration  
227 and discharge rates.

228 3.5. Vegetation and surface cover.

229 Shortly before simulations plot surface and vegetative cover was measured at 400 points on  
230 a 15 x 20 cm grid using a laser and line-point intercept procedure (Herrick et al., 2005).  
231 Vegetative cover was classified as forbs, grass, and shrub. Surface cover was characterized as  
232 rock, litter, plant basal area, and bare soil. These 4 metrics were further classified as protected  
233 (located under plant canopy) and unprotected (not covered by the canopy).

234 In addition, plant canopy and basal gaps were measured on the plots over three lengthwise  
235 and six crosswise transects. These were reported as the sum and the average of all inter canopy  
236 and inter basal spaces greater than 10 cm along the transects.

237

238 **4. Experimental procedure**

239

240 Four to eight 6.1 by 2 m replicated rainfall simulation plots were established on each site  
241 (Mayerhofer et al., 2017). The plots were bound by sheet metal borders hammered into the  
242 ground on three sides. On the down slope side a collection trough was installed to channel runoff  
243 into the measuring flume. If a site was revisited, repeat simulations were always conducted on  
244 the same long term plots. In these cases the lateral borders remained installed in the field, while  
245 top the border and runoff flume were removed to avoid obstructing natural runoff during interim  
246 period.

247 The plots were classified as “burn”- or “natural” (labeled as “B” or “N” respectively in  
248 [Appendix B](#)). The burn plots were established on six sites affected by wildfires that occurred  
249 between 2000 and 2006 (~~Table X~~). These plots were in various stages of recovery during the  
250 experiments. The natural plots had no recent documented wildfires. With the exception of  
251 Audubon Research Ranch burn plots were paired with natural control plots located on the same  
252 site in close proximity. On 53 plots (13 sites) rainfall simulations were repeated up to 5 times in  
253 the following years (2002 through 2013) in order to monitor post brush treatment, burn recovery,  
254 or ecological site transition.

255 The experimental procedure was as follows. First, the plot was subjected to 45 min long, 65  
256 mm h<sup>-1</sup> intensity simulated rainfall (dry run) intended to create initial saturated condition that  
257 could be replicated across all sites. This was followed by a 45 minute pause and a second  
258 simulation with varying intensity (wet run) (Fig. 3). During wet runs two modes of water  
259 application were used as previously described: rainfall and run-on. Rainfall only wet runs  
260 accounted for 79% of simulations, while the rest were run-on flow only, or a combination of  
261 rainfall and run-on flow. [Table 2 shows an excerpt from one of 272 simulation data sheets. The](#)

262 first seven columns are site attributes and the rest are time series of data recorded during the run.  
263 N/A indicates not measured or missing. Run time (min) of each experiment begins at  
264 commencement of water application and ends at cessation of runoff.

265 Rainfall wet runs typically consisted of series of application rates (65, 100, 125, 150, and  
266 180 mm h<sup>-1</sup>) that were increased after runoff had reached steady state for at least five minutes.  
267 Runoff samples were collected on the rising and falling limb of the hydrograph and during each  
268 steady state (a minimum of 3 samples). Overland flow velocities were measured during each  
269 steady state as previously described. Run-on wet runs followed the same procedure as rainfall  
270 runs, except water application rates varied between 100 and 300 mm h<sup>-1</sup>.

271 In approximately 20% of simulation experiments wet run was followed by another  
272 simulation (wet2 run) after a 45 min pause. Wet2 runs were similar to wet runs and also  
273 consisted of series of varying intensity rainfalls and/or run-on input.  
274

## 275 **5. Data availability**

276 The data set available from the National Agricultural Library at website  
277 <https://data.nal.usda.gov/search/type/dataset> (DOI: 10.15482/USDA.ADC/1358583). It includes  
278 short description and methods, data dictionary, geographic information, hydrological, erosion,  
279 and vegetation data files, and a set of sites and plot images.  
280  
281

## 282 **6. Conclusion**

283 Soil erosion researchers study complex system with large number of temporally variable  
284 inputs, interactions, feedbacks, and stochastic relationships. Many variables are difficult to  
285 measure accurately. Hence, it is critical to assemble comprehensive and long term datasets to  
286 enable robust statistical analysis, facilitate comparisons and detect long term trends. There is also  
287 a need to standardize rainfall simulators and experimental protocols (Kibet et al., 2014) and  
288 provide for better dissemination of collected information among researchers (Parsons and  
289 Lascelles, 2000).

290 This paper presents the results of 272 rainfall simulation experiments on small plots in  
291 semi-arid rangelands of southwestern USA. The experiments spanning 12 years were conducted  
292 in Arizona and Nevada in four MLRAs (28B, 38-1, 41-1, 41-3) and represented four ecological  
293 sites (Clay loam upland, Limy upland, Loamy slope, Loamy upland). These sites are  
294 characterized by coarse gravelly soils and annual precipitation of 250 to 500 mm.

295 The simulations were conducted under a wide range of rainfall intensities (60 mm h<sup>-1</sup> to  
296 180 mm h<sup>-1</sup>) on plots with a variety of slopes (4% to 40%), ground cover (22% to 99%), and  
297 foliar cover (0-85%). Many of the locations have been affected by grazing, wildfire, or brush  
298 treatment and were in various stages of recovery or ecological transition during the experiments.  
299 Repeat multi-year simulations and detailed vegetation and land management records place the  
300 results in a broader ecological context, rare for this type of studies.  
301

302 Runoff and erosion rates on plots were affected by high heterogeneity and complex  
303 spatial structure of rangeland sites. Gravelly soils often develop a surface rock layer with  
304 increased roughness resulting in complex hydrological interactions. Hence, variability between  
305 replicated plots was greater than typically observed on cultivated fields. The variation in  
306 sediment yield during runs was also significant, suggesting that 3 runoff samples may not be

307 enough to accurately characterize a steady state sediment yield at a given rainfall rate. In a small  
308 number of simulations run-on flow rates were unknown as previously described. Care must be  
309 taken when scaling the results to a hill slope or watershed size. On the plot size areas surface  
310 roughness, vegetation pattern, sheet to rill flow transition are critical factors, while lithology,  
311 topography, and channel network need to be considered at greater spatial magnitude (Kirkby et  
312 al., 1996). Transmission losses of sediment and runoff at slope (Parsons et al., 2006) and  
313 watershed (Lane et al., 1997) scales have been observed. Although the simulator was shielded  
314 from wind while in operation some wind interference should not be discounted.

315 The scope of this data set combined with state of the art rainfall simulation equipment  
316 makes it particularly valuable to advance our understanding of basic erosion and transport  
317 processes specific to arid rangelands. Orthogonal photographs of the plots provide basis for  
318 cover structure and connectivity analysis. The data can be used to evaluate and compare  
319 management practices, and study ecological states, transitions and thresholds. It can also support  
320 erosion model development and validation.  
321

## 322 **7. Acknowledgements**

323  
324 The authors wish to express their appreciation to the Southwest Watershed Research  
325 Center staff, particularly John Smith, Howard Larsen, and Aaron Sobel, whose dedicated efforts  
326 in collecting data made this research possible. The USDA is an Equal Opportunity Employer.  
327



328           **References**

- 329   Adams, D. K. and Comrie, A. C.: The North American monsoon, *Bulletin of the American Meteorological Society*, 78, 2197-2213, 1997.  
330
- 331   Herrick, J. E., Van Zee, J. W., Havstad, K. M., Burkett, L. M., and Whitford, W. G.: Monitoring manual for  
332   grassland, Shrubland and Savanna Ecosystems. In: *Quick Start*. USDA-ARS Journal of Experimental Range,  
333   The University of Arizona Press, AZ, USA, 2005.
- 334   Kibet, L. C., Saporito, L. S., Allen, A. L., May, E. B., Kleinman, P. J. A., Hashem, F. M., and Bryant, R. B.: A  
335   Protocol for Conducting Rainfall Simulation to Study Soil Runoff, *J. Vis. Exp.*, doi: 10.3791/51664, 2014.  
336   2014.
- 337   Kirkby, M. J., Imeson, A. C., Bergkamp, G., and Cammeraat, L. H.: Scaling up processes and models from  
338   the field plot to the watershed and regional areas, *J. Soil Water Conserv.*, 51, 391-396, 1996.
- 339   Lane, L. J., Hernandez, M., and Nichols, M.: Processes controlling sediment yield from watersheds as  
340   functions of spatial scale, *Environ. Modell. Softw.*, 12, 355-369, 1997.
- 341   Lascelles, B., Favis-Mortlock, D. T., Parsons, A. J., and Guerra, A. J. T.: Spatial and temporal variation in  
342   two rainfall simulators: Implications for spatially explicit rainfall simulation experiments, *Earth Surf.*  
343   *Process. Landf.*, 25, 709-721, 2000.
- 344   Mayerhofer, C., Meissl, G., Klebinder, K., Kohl, B., and Markart, G.: Comparison of the results of a small-  
345   plot and a large-plot rainfall simulator - Effects of land use and land cover on surface runoff in Alpine  
346   catchments, *Catena*, 156, 184-196, 2017.
- 347   Meyer, L. D. and McCune, D. L.: Rainfall simulator for runoff plots, *Agricultural Engineering*, 39, 644-648,  
348   1958.
- 349   Moran, M. S., Hamerlynck, E. P., Scott, R. L., Emmerich, W. E., and Holifield Collins, C. D.: Soil evaporative  
350   response to Lehmann lovegrass (*Eragrostis lehmanniana*) invasion in a semiarid watershed. In: *The Third*  
351   *Interagency Conference on Research in the Watersheds*, 8-11 September 2008, Estes Park, CO, 2009.
- 352   Nichols, M. H.: Measured sediment yield rates from semiarid rangeland watersheds, *Rangel. Ecol.*  
353   *Manag.*, 59, 55-62, 2006.
- 354   Nichols, M. H., Stone, J. J., and Nearing, M. A.: Sediment database, Walnut Gulch Experimental  
355   Watershed, Arizona, United States, *Water Resour. Res.*, 44, W05S06, doi:10.1029/2006WR005682,  
356   2008.
- 357   NRCS: *Soil Survey of Cochise County, Arizona, Douglas-Tombstone Part.*, NRCS, Washington, DC, 2003.
- 358   Paige, G. B., Stone, J. J., Smith, J. R., and Kennedy, J. R.: The walnut gulch rainfall simulator: A computer-  
359   controlled variable intensity rainfall simulator, *Appl. Eng. Agric.*, 20, 25-31, 2004.
- 360   Parsons, A. J., Brazier, R. E., Wainwright, J., and Powell, D. M.: Scale relationships in hillslope runoff and  
361   erosion, *Earth Surf. Process. Landf.*, 31, 1384-1393, 2006.
- 362   Parsons, A. J. and Lascelles, B.: Rainfall simulation in geomorphology, *Earth Surf. Process. Landf.*, 25,  
363   679-679, 2000.

364 Polyakov, V. O., Nearing, M. A., Stone, J. J., Hamerlynck, E. P., Nichols, M. H., Collins, C. D. H., and Scott,  
365 R. L.: Runoff and erosional responses to a drought-induced shift in a desert grassland community  
366 composition, *J. Geophys. Res.-Biogeosci.*, 115, 2010.

367 Stavi, I., Lavee, H., Ungar, E. D., and Sarah, P.: Ecogeomorphic Feedbacks in Semiarid Rangelands: A  
368 Review, *Pedosphere*, 19, 217-229, 2009.

369 Stone, J. J., Nichols, M. H., Goodrich, D. C., and Buono, J.: Long-term runoff database, Walnut Gulch  
370 Experimental Watershed, Arizona, United States, *Water Resour. Res.*, 44, 2008.

371 Swanson, N. P.: Rotating-boom rainfall simulator, *Transactions of ASAE*, 1965. 71-72, 1965.

372 USDA: Land Resource Regions and Major Land Resource Areas of the U.S., the Caribbean, and the Pacific  
373 Basin, 2006.

374 Yakubu, M. L. and Yusop, Z.: Adaptability of rainfall simulators as a research tool on urban sealed  
375 surfaces - a review, *Hydrol. Sci. J.-J. Sci. Hydrol.*, 62, 996-1012, 2017.

376 Yisehak, K., Belay, D., Taye, T., and Janssens, G. P. J.: Impact of soil erosion associated factors on  
377 available feed resources for free-ranging cattle at three altitude regions: Measurements and  
378 perceptions, *J. Arid. Environ.*, 98, 70-78, 2013.

379

#### 380 **Figure captions**

381

382 Figure 1. Walnut Gulch Rainfall Simulator.

383 Figure 2. Breakthrough curve of electrolyte solution in runoff at 150 mm h<sup>-1</sup> rainfall intensity.

384 Figure 3. Typical hydrograph of a rainfall simulation run.

385

386

387

388

389

390

## Tables

Table 1. Summary of rainfall simulation sites.

| Location          | Site ID   | Coordinates |            | MLRA            | Vegetation type | Soil texture            | Plot N | Average slope, % | Simulation years             |
|-------------------|-----------|-------------|------------|-----------------|-----------------|-------------------------|--------|------------------|------------------------------|
|                   |           | Latitude    | Longitude  |                 |                 |                         |        |                  |                              |
| Audubon Ranch     | EM        | 31.589794   | -110.48768 | 41-3            | perennial-grass | sandy loam              | 4      | 13.0             | 2002, 2003, 2004             |
|                   | PC        | 31.585556   | -110.52750 | 41-3            | perennial-grass | gravely loam            | 8      | 8.0              | 2002, 2003, 2004, 2006       |
| Empire Ranch      | ER1       | 31.708600   | -110.58840 | 41-3            | perennial-grass | gravely loam            | 4      | 12.9             | 2003                         |
|                   | ER2       | 31.708600   | -110.58840 | 41-3            | perennial-grass | gravely loam            | 8      | 12.9             | 2003, 2007, 2010, 2013       |
|                   | ER3       | 31.764270   | -110.55947 | 41-3            | perennial-grass | gravely loam            | 12     | 13.3             | 2005, 2006, 2009, 2013       |
|                   | ER4G      | 31.795705   | -110.61760 | 41-3            | perennial-grass | gravely loam            | 8      | 4.7              | 2006, 2010, 2013             |
|                   | ER4S      | 31.795644   | -110.61870 | 41-3            | shrub           | gravely loam            | 4      | 4.3              | 2006, 2007, 2010, 2013       |
| Porter Canyon     | ER5       | 31.756388   | -110.67916 | 41-3            | perennial-grass | gravely loam            | 4      | 6.3              | 2010                         |
|                   | PCE       | 39.463703   | -117.62154 | 28B             | juniper         | very gravely loam       | 6      | 35.8             | 2009                         |
| San Rafael Valley | PCW       | 39.463841   | -117.62253 | 28B             | juniper         | cobbly sandy loam       | 4      | 23.5             | 2009                         |
|                   | Ab        | 31.441152   | -110.52191 | 41-1            | oak savanna     | gravely loam            | 8      | 10.3             | 2003, 2004, 2005, 2007       |
| WGEW              | SA        | 31.390278   | -110.64945 | 41-1            | oak savanna     | gravely loam            | 8      | 16.1             | 2005, 2006, 2009             |
|                   | Ta        | 31.413741   | -110.63900 | 41-3            | perennial-grass | very gravely loam       | 8      | 25.4             | 2004, 2005, 2007             |
|                   | Wi        | 31.452168   | -110.63390 | 41-3            | perennial-grass | gravely loam            | 8      | 8.4              | 2006, 2007, 2010             |
|                   | K2        | 31.736116   | -109.94335 | 41-3            | perennial-grass | gravely fine sandy loam | 8      | 10.8             | 2005, 2007, 2008, 2010, 2013 |
|                   | K3        | 31.736116   | -109.94335 | 41-3            | perennial-grass | gravely fine sandy loam | 8      | 9.7              | 2008                         |
| Young, AZ         | CR        | 31.684345   | -109.99314 | 41-3            | shrub           | gravely sandy loam      | 6      | 14.7             | 2009                         |
|                   | LH1       | 31.740670   | -110.05330 | 41-3            | shrub           | gravely sandy loam      | 6      | 15.8             | 2003, 2007                   |
|                   | LH2       | 31.740670   | -110.05330 | 41-3            | shrub           | gravely sandy loam      | 8      | 7.8              | 2008                         |
|                   | LH3       | 31.741970   | -110.05440 | 41-3            | shrub           | gravely sandy loam      | 4      | 8.4              | 2004                         |
|                   | Yg1       | 34.178203   | -110.98083 | 38-1            | perennial-grass | clay loam               | 8      | 12.7             | 2011                         |
| Yg2               | 34.178891 | -110.98081  | 38-1       | perennial-grass | clay loam       | 8                       | 8.8    | 2011, 2012       |                              |
| Yg3               | 34.185290 | -110.92450  | 38-1       | treated juniper | clay loam       | 8                       | 5.2    | 2012             |                              |

Formatted Table

| Location      | Site ID | MLRA         | Ecological site | Precipitation mm | Vegetation type | Soil texture | Plot N | Slope % | Simulation years       |
|---------------|---------|--------------|-----------------|------------------|-----------------|--------------|--------|---------|------------------------|
| Audubon Ranch | EM      | 41-3         | Loamy Slope     | 300-400          | perennial grass | sandy loam   | 4      | 13.0    | 2002, 2003, 2004       |
|               | PC      | 41-3         | Loamy Upland    | 300-400          | perennial grass | gravely loam | 8      | 8.0     | 2002, 2003, 2004, 2006 |
| Empire Ranch  | ER1     | 41-3         | Loamy Upland    | 300-400          | perennial grass | gravely loam | 4      | 12.9    | 2003                   |
|               | ER2     | 41-3         | Loamy Upland    | 300-400          | perennial grass | gravely loam | 8      | 12.9    | 2003, 2007, 2010, 2013 |
|               | ER3     | 41-3         | Loamy Upland    | 300-400          | perennial grass | gravely loam | 12     | 13.3    | 2005, 2006, 2009, 2013 |
|               | ER4G    | 41-3         | Loamy Upland    | 300-400          | perennial grass | gravely loam | 8      | 4.7     | 2006, 2010, 2013       |
|               | ER4S    | 41-3         | Loamy Upland    | 300-400          | shrub           | gravely loam | 4      | 4.3     | 2006, 2007, 2010, 2013 |
| ER5           | 41-3    | Loamy Upland | 300-400         | perennial grass  | gravely loam    | 4            | 6.3    | 2010    |                        |

Formatted Table

|                          |                                                                               |                                                                                        |                                                                                                                                    |                                                                                                          |                                                                                                                  |                                                                                                                                                                                      |                                                                      |                                                                                     |                                                                                                                      |
|--------------------------|-------------------------------------------------------------------------------|----------------------------------------------------------------------------------------|------------------------------------------------------------------------------------------------------------------------------------|----------------------------------------------------------------------------------------------------------|------------------------------------------------------------------------------------------------------------------|--------------------------------------------------------------------------------------------------------------------------------------------------------------------------------------|----------------------------------------------------------------------|-------------------------------------------------------------------------------------|----------------------------------------------------------------------------------------------------------------------|
| <u>Porter Canyon</u>     | <u>PCE</u><br><u>PCW</u>                                                      | <u>28B</u><br><u>28B</u>                                                               | <u>Loamy Slope</u><br><u>Loamy Slope</u>                                                                                           | <u>400-500</u><br><u>400-500</u>                                                                         | <u>juniper</u><br><u>juniper</u>                                                                                 | <u>very gravely loam</u><br><u>cobbly sandy loam</u>                                                                                                                                 | <u>6</u><br><u>4</u>                                                 | <u>35.8</u><br><u>23.5</u>                                                          | <u>2009</u><br><u>2009</u>                                                                                           |
| <u>San Rafael Valley</u> | <u>Ab</u><br><u>SA</u><br><u>Ta</u><br><u>Wi</u>                              | <u>41-1</u><br><u>41-1</u><br><u>41-3</u><br><u>41-3</u>                               | <u>Loamy Upland</u><br><u>Loamy Upland</u><br><u>Clay Loam Upland</u><br><u>Loamy Upland</u>                                       | <u>400-500</u><br><u>400-500</u><br><u>300-400</u><br><u>400-500</u>                                     | <u>oak savanna</u><br><u>oak savanna</u><br><u>perennial grass</u><br><u>perennial grass</u>                     | <u>gravely loam</u><br><u>gravely loam</u><br><u>very gravely loam</u><br><u>gravely loam</u>                                                                                        | <u>8</u><br><u>8</u><br><u>8</u><br><u>8</u>                         | <u>10.3</u><br><u>16.1</u><br><u>25.4</u><br><u>8.4</u>                             | <u>2003, 2004, 2005, 2007</u><br><u>2005, 2006, 2009</u><br><u>2004, 2005, 2007</u><br><u>2006, 2007, 2010</u>       |
| <u>WGEW</u>              | <u>K2</u><br><u>K3</u><br><u>CR</u><br><u>LH1</u><br><u>LH2</u><br><u>LH3</u> | <u>41-3</u><br><u>41-3</u><br><u>41-3</u><br><u>41-3</u><br><u>41-3</u><br><u>41-3</u> | <u>Loamy Upland</u><br><u>Loamy Upland</u><br><u>Limy Upland</u><br><u>Limy Upland</u><br><u>Limy Upland</u><br><u>Limy Upland</u> | <u>300-400</u><br><u>300-400</u><br><u>300-400</u><br><u>300-400</u><br><u>300-400</u><br><u>300-400</u> | <u>perennial grass</u><br><u>perennial grass</u><br><u>shrub</u><br><u>shrub</u><br><u>shrub</u><br><u>shrub</u> | <u>gravely fine sandy loam</u><br><u>gravely fine sandy loam</u><br><u>gravely sandy loam</u><br><u>gravely sandy loam</u><br><u>gravely sandy loam</u><br><u>gravely sandy loam</u> | <u>8</u><br><u>8</u><br><u>6</u><br><u>6</u><br><u>8</u><br><u>4</u> | <u>10.8</u><br><u>9.7</u><br><u>14.7</u><br><u>15.8</u><br><u>7.8</u><br><u>8.4</u> | <u>2005, 2007, 2008, 2010, 2013</u><br><u>2008</u><br><u>2009</u><br><u>2003, 2007</u><br><u>2008</u><br><u>2004</u> |
| <u>Young</u>             | <u>Yq1</u><br><u>Yq2</u><br><u>Yq3</u>                                        | <u>38-1</u><br><u>38-1</u><br><u>38-1</u>                                              | <u>Clay Loam Upland</u><br><u>Clay Loam Upland</u><br><u>Clay Loam Upland</u>                                                      | <u>500-600</u><br><u>500-600</u><br><u>500-600</u>                                                       | <u>perennial grass</u><br><u>perennial grass</u><br><u>treated juniper</u>                                       | <u>clay loam</u><br><u>clay loam</u><br><u>clay loam</u>                                                                                                                             | <u>8</u><br><u>8</u><br><u>8</u>                                     | <u>12.7</u><br><u>8.8</u><br><u>5.2</u>                                             | <u>2011</u><br><u>2011, 2012</u><br><u>2012</u>                                                                      |



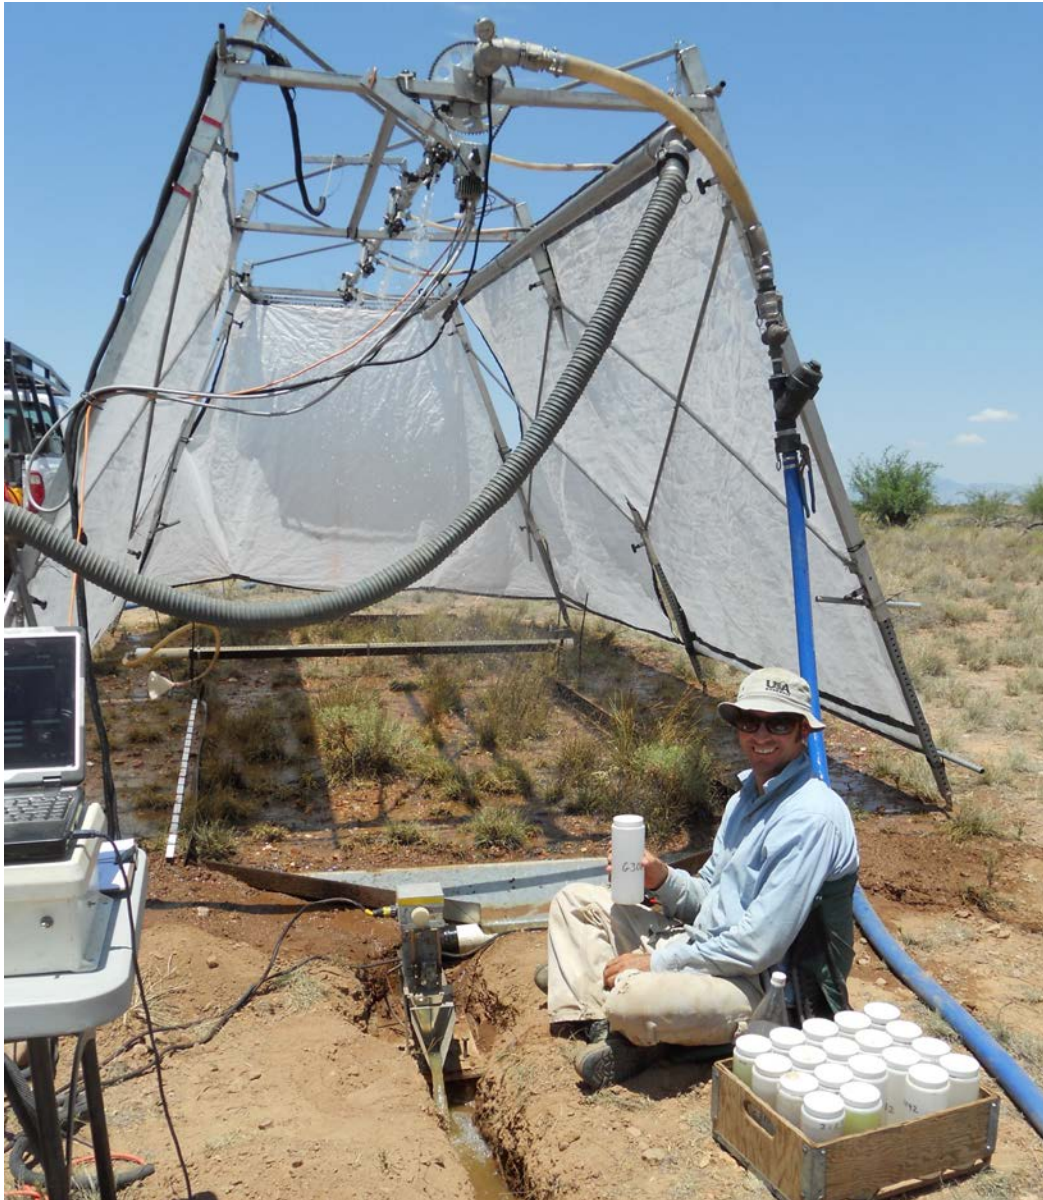

Figure 1. Walnut Gulch Rainfall Simulator.

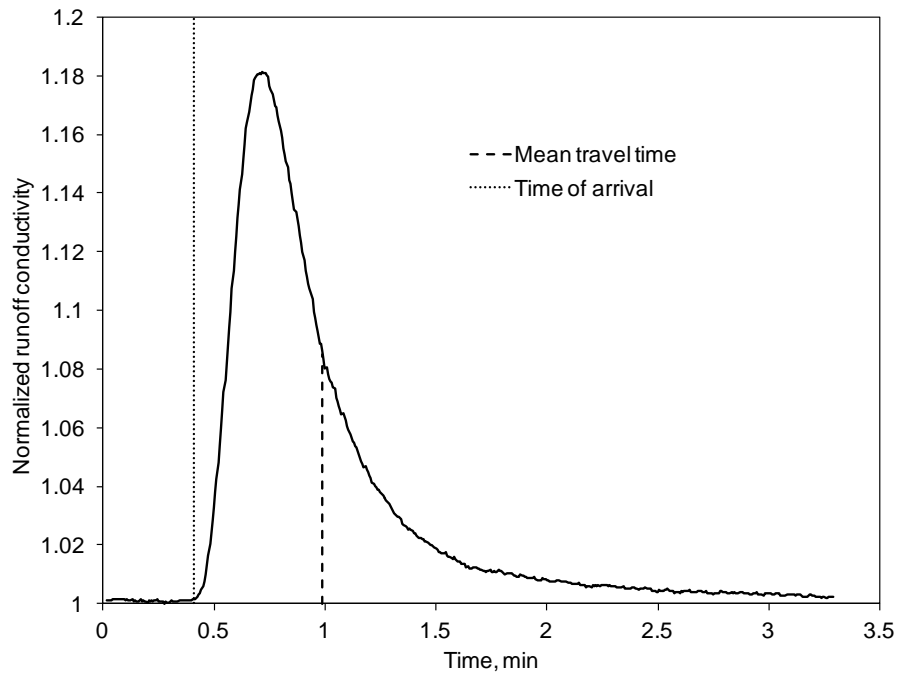

Figure 2. Electrolyte solution breakthrough curve in plot runoff at  $150 \text{ mm h}^{-1}$  intensity.

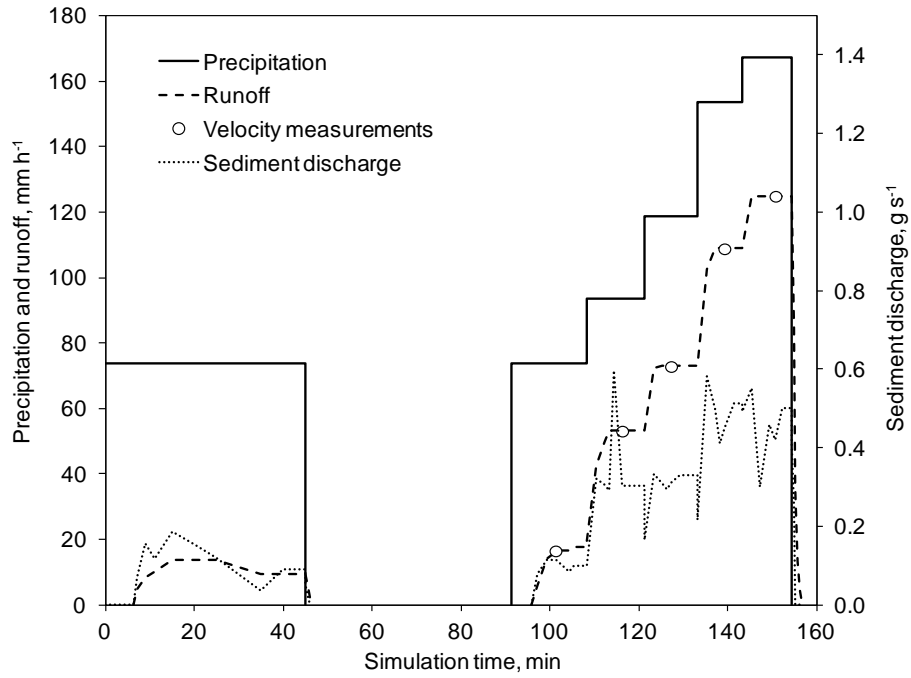

Figure 3. Typical hydrograph of a rainfall simulation run.
